# Supplementary material for: The consumptive water footprint of electricity and heat: a global assessment
Source: Royal Society of Chemistry journal article supplement (doi:10.1039/c5ew00026b), 2015-01-01
Supplement: c5ew00026b1.pdf [file c5ew00026b1.pdf]

## Supplementary Information

Table S1. Literature on the WF of electricity from different energy sources.

| Energy source                  | Data sources regarding WF of energy                                                                                                                                                                                                                                                                                                                                                                                                                       |
|--------------------------------|-----------------------------------------------------------------------------------------------------------------------------------------------------------------------------------------------------------------------------------------------------------------------------------------------------------------------------------------------------------------------------------------------------------------------------------------------------------|
| Coal                           | DOE <sup>1</sup> ; Gleick <sup>2</sup> ; Evans et al. <sup>3</sup> ; Inhaber <sup>4</sup> ; BLM <sup>5</sup> ; NETL <sup>6</sup> ; Fthenakis and Kim <sup>7</sup> ; Macknick et al. <sup>8</sup> ; Meldrum et al. <sup>9</sup> ; Williams and Simmons <sup>10</sup> ; Spang et al. <sup>11</sup>                                                                                                                                                          |
| Lignite                        | DOE <sup>1</sup> ; Gleick <sup>2</sup> ; Evans et al. <sup>3</sup> ; BLM <sup>5</sup> ; NETL <sup>6</sup> ; Meldrum et al. <sup>9</sup> ; Williams and Simmons <sup>10</sup> ;                                                                                                                                                                                                                                                                            |
| Conventional oil               | Gleick <sup>2</sup> ; Inhaber <sup>4</sup> ; Williams and Simmons <sup>10</sup> ; Spang et al. <sup>11</sup> ; WU et al. <sup>12, 13</sup>                                                                                                                                                                                                                                                                                                                |
| Unconventional oil (oil sand)  | Gleick <sup>2</sup> ; Williams and Simmons <sup>10</sup> ; Spang et al. <sup>11</sup> ; WU et al. <sup>12, 13</sup> ;                                                                                                                                                                                                                                                                                                                                     |
| Unconventional oil (oil shale) | Gleick <sup>2</sup> ; Williams and Simmons <sup>10</sup> ; WU et al. <sup>12</sup> ;                                                                                                                                                                                                                                                                                                                                                                      |
| Natural gas                    | Gleick <sup>2</sup> ; Inhaber <sup>4</sup> ; Fthenakis and Kim <sup>7</sup> ; Macknick et al. <sup>8</sup> ; Meldrum et al. <sup>9</sup> ; Williams and Simmons <sup>10</sup> ; Spang et al. <sup>11</sup>                                                                                                                                                                                                                                                |
| Shale gas                      | Gleick <sup>2</sup> ; Meldrum et al. <sup>9</sup> ; Williams and Simmons <sup>10</sup> ; Spang et al. <sup>11</sup>                                                                                                                                                                                                                                                                                                                                       |
| Nuclear                        | Gleick <sup>2</sup> ; Inhaber <sup>4</sup> ; Fthenakis and Kim <sup>7</sup> ; Macknick et al. <sup>8</sup> ; Meldrum et al. <sup>9</sup> ; Williams and Simmons <sup>10</sup> ; Spang et al. <sup>11</sup> ; Mudd <sup>14</sup> ; Murray <sup>15</sup> ; Schneider et al. <sup>16</sup> ; Stempien et al. <sup>17</sup> ;                                                                                                                                 |
| Biomass (crops)                | Fthenakis and Kim <sup>7</sup> ; Gerbens-Leenes et al. <sup>18</sup> ; Mekonnen and Hoekstra <sup>19</sup>                                                                                                                                                                                                                                                                                                                                                |
| Biomass (firewood)             | Fthenakis and Kim <sup>7</sup> ; Meldrum et al. <sup>9</sup> ; Van Oel and Hoekstra <sup>20</sup>                                                                                                                                                                                                                                                                                                                                                         |
| Hydropower                     | Gleick <sup>2</sup> ; Inhaber <sup>4</sup> ; Fthenakis and Kim <sup>7</sup> ; Macknick et al. <sup>8</sup> ; Meldrum et al. <sup>9</sup> ; Torcellini et al. <sup>21</sup> ; Pasqualetti and Kelly <sup>22</sup> ; Gerbens-Leenes et al. <sup>23</sup> ; Herath et al. <sup>24</sup> ; Arnøy <sup>25</sup> ; Yesu <sup>26</sup> ; Tefferi <sup>27</sup> ; Mekonnen and Hoekstra <sup>28</sup> ; Bakken et al. <sup>29</sup> ; Demeke et al. <sup>30</sup> |
| Concentrated solar power       | Inhaber <sup>4</sup> ; Fthenakis and Kim <sup>7</sup> ; Macknick et al. <sup>8</sup> ; Meldrum et al. <sup>9</sup> ; Spang et al. <sup>11</sup>                                                                                                                                                                                                                                                                                                           |
| Photovoltaics                  | Inhaber <sup>4</sup> ; Fthenakis and Kim <sup>7</sup> ; Macknick et al. <sup>8</sup> ; Meldrum et al. <sup>9</sup> ; Spang et al. <sup>11</sup>                                                                                                                                                                                                                                                                                                           |
| Wind                           | Inhaber <sup>4</sup> ; Fthenakis and Kim <sup>7</sup> ; Macknick et al. <sup>8</sup> ; Meldrum et al. <sup>9</sup> ; Spang et al. <sup>11</sup>                                                                                                                                                                                                                                                                                                           |
| Geothermal                     | Inhaber <sup>4</sup> ; Fthenakis and Kim <sup>7</sup> ; Macknick et al. <sup>8</sup> ; Meldrum et al. <sup>9</sup> ; Spang et al. <sup>11</sup> ; NETL <sup>31</sup>                                                                                                                                                                                                                                                                                      |

## References

1. DOE, *Energy technology characterizations handbook: Environmental pollution and control factors*, US Department of Energy (DOE), Washington D.C., USA, 1983.
2. P. H. Gleick, *Annual Review of Energy and the Environment*, 1994, 19, 267-299.
3. R. Evans, P. Roe and J. Joy, presented in part at the Minerals Council of Australia's Sustainable Development Conference, Brisbane, Australia, November, 2003.
4. H. Inhaber, *Energy Sources*, 2004, 26, 309-322.
5. BLM, *Final environmental impact statement for the West Antelope II coal lease application*, Report WYW163340, Department of the Interior, Bureau of Land Management (BLM), Casper Field Office, Casper, Wyoming, USA, 2008.
6. NETL, *NETL life cycle inventory data – Unit process: Underground mine, Illinois no. 6 bituminous coal operation*, Department of Energy, National Energy Technology Laboratory (NETL), Pittsburgh, Pennsylvania, USA, 2009.
7. V. Fthenakis and H. C. Kim, *Renewable and Sustainable Energy Reviews*, 2010, 14, 2039-2048.
8. J. Macknick, R. Newmark, G. Heath and K. C. Hallett, *Environmental Research Letters*, 2012, 7, 045802.
9. J. Meldrum, S. Nettles-Anderson, G. Heath and J. Macknick, *Environmental Research Letters*, 2013, 8, 015031.
10. E. D. Williams and J. E. Simmons, *Water in the energy industry: An introduction*, BP International, London, UK, 2013.

11. E. S. Spang, W. R. Moomaw, K. S. Gallagher, P. H. Kirshen and D. H. Marks, *Environmental Research Letters*, 2014, 9.
12. M. Wu, M. Mintz, M. Wang and S. Arora, *Consumptive water use in the production of bioethanol and petroleum gasoline*, Center for Transportation Research, Energy Systems Division, Argonne National Laboratory, Chicago, USA, 2008.
13. M. Wu, M. Mintz, M. Wang and S. Arora, *Environmental Management*, 2009, 44, 981-997.
14. G. M. Mudd, *Mine Water Environ*, 2008, 27, 136-144.
15. R. L. Murray, *Nuclear energy: An introduction to the concepts, systems, and applications of nuclear processes*, Butterworth-Heinemann, Burlington, USA, 6<sup>th</sup> edn., 2009.
16. E. Schneider, B. Carlsen, E. Tavriles, C. van der Hoeven and U. Phathanapirom, *Energy Economics*, 2013, 40, 898-910.
17. J. D. Stempien, H. Meteyer and M. S. Kazimi, *Water use in the nuclear fuel cycle*, Report MIT-NES-TR-017, MIT Center for Advanced Nuclear Energy Systems, Massachusetts, USA, 2013.
18. W. Gerbens-Leenes, A. Y. Hoekstra and T. H. van der Meer, *Proceedings of the National Academy of Sciences of the United States of America*, 2009, 106, 10219-10223.
19. M. M. Mekonnen and A. Y. Hoekstra, *Hydrology and Earth System Sciences*, 2011, 15, 1577-1600.
20. P. R. Van Oel and A. Y. Hoekstra, *Water Resources Management*, 2012, 26, 733-749.
21. P. Torcellini, N. Long and R. Judkoff, *Consumptive water use for U.S. power production*, Report TP-550-33905, National Renewable Energy Laboratory (NREL), Golden, CO, USA, 2003.
22. M. J. Pasqualetti and S. Kelley, *The water costs of electricity in Arizona* Arizona Department of Water Resources, Phoenix, USA, 2008.
23. P. W. Gerbens-Leenes, A. Y. Hoekstra and T. van der Meer, *Ecological Economics*, 2009, 68, 1052-1060.
24. I. Herath, M. Deurer, D. Horne, R. Singh and B. Clothier, *Journal of Cleaner Production*, 2011, 19, 1582-1589.
25. S. Arnøy, M.Sc., Norwegian University of Life Sciences, 2012.
26. M. B. Yesuf, M.Sc. Master Thesis, Norwegian University of Science and Technology, 2012.
27. M. A. Tefferi, M.Sc. Master thesis, Norwegian University of Science and Technology, 2012.
28. M. M. Mekonnen and A. Y. Hoekstra, *Hydrol. Earth Syst. Sci.*, 2012, 16, 179-187.
29. T. H. Bakken, Å. Killingtveit, K. Engeland, K. Alfredsen and A. Harby, *Hydrol. Earth Syst. Sci.*, 2013, 17, 3983-4000.
30. T. A. Demeke, M. Marencé and A. E. Mynett, presented in part at the Proceedings from Africa, Addis Ababa, Ethiopia, 16-18 April, 2013.
31. NETL, *Role of alternative energy sources: Geothermal technology assessment*, Report DOE/NETL-2012/1531, Department of Energy, National Energy Technology Laboratory (NETL), Pittsburgh, Pennsylvania, USA, 2012.
